# Supplementary material
Source: ML conference proceedings conference paper supplement (https://openreview.net/forum?id=KXYfzWdbPu)
Supplement: supplementary_material [file attachment]

## A EXAMPLES OF COMPUTATIONS

### A.1 STEP BY STEP EXAMPLE : AUTONOMOUS CONTROL

To measure whether the system

$$\begin{aligned}\frac{dx_1(t)}{dt} &= \sin(x_1^2) + \log(1+x_2) + \frac{\text{atan}(ux_1)}{1+x_2} \\ \frac{dx_2(t)}{dt} &= x_2 - e^{x_1x_2},\end{aligned}$$

is controllable at a point  $x_e$ , with asymptotic control  $u_e$ , using Kalman condition we need to

1. differentiate the system with respect to its internal variables, obtain the Jacobian  $A(x, u)$

$$A(x, u) = \begin{pmatrix} 2x_1 \cos(x_1^2) + \frac{u(1+x_2)^{-1}}{1+u^2x_1^2} & (1+x_2)^{-1} - \frac{\text{atan}(ux_1)}{(1+x_2)^2} \\ -x_2e^{x_1x_2} & 1 - x_1e^{x_1x_2} \end{pmatrix}$$

2. differentiate the system with respect to its control variables, obtain a matrix  $B(x, u)$

$$B(x, u) = \begin{pmatrix} x_1((1+u^2x_1^2)(1+x_2))^{-1} \\ 0 \end{pmatrix}$$

3. evaluate  $A$  and  $B$  in  $x_e = [0.5]$ ,  $u_e = 1$

$$A(x_e, u_e) = \begin{pmatrix} 1.50 & 0.46 \\ -0.64 & 0.36 \end{pmatrix}, \quad B(x_e, u_e) = \begin{pmatrix} 0.27 \\ 0 \end{pmatrix}$$

4. calculate the controllability matrix given by [\[2\]](#).

$$C = [B, AB]((x_e, u_e)) = \left[ \begin{pmatrix} 0.27 \\ 0 \end{pmatrix}, \begin{pmatrix} 1.50 & 0.46 \\ -0.64 & 0.36 \end{pmatrix} \begin{pmatrix} 0.27 \\ 0 \end{pmatrix} \right] = \begin{pmatrix} 0.27 & 0.40 \\ 0 & -0.17 \end{pmatrix}$$

5. output  $n - d$ , with  $d$  the rank of the controllability matrix, the system is controllable if  $n - d = 0$

$$n - \text{rank}(C) = 2 - 2 = 0 : \text{System is controllable in } (x_e = [0.5], u_e = 1)$$

6. (optionally) if  $n - d = 0$ , compute the control feedback matrix  $K$  as in [\[3\]](#)

$$K = (-22.8 \quad 44.0).$$

### A.2 STEP BY STEP EXAMPLE: STABILITY OF LINEAR PDE

To find the existence and behavior at infinite time of a solution, given a differential operator  $D_x$  and an initial condition  $u_0$  we proceed as follows

1. find the Fourier polynomial  $f(\xi)$  associated to  $D_x$

$$\begin{aligned}D_x &= 2\partial_{x_0}^2 + 0.5\partial_{x_1}^2 + \partial_{x_2}^4 - 7\partial_{x_0, x_1}^2 - 1.5\partial_{x_1}\partial_{x_2}^2, \\ f(\xi) &= -4\pi\xi_0^2 - \pi\xi_1^2 + 2\pi\xi_2^4 + 14\pi\xi_0\xi_1 + 3i\pi\xi_1\xi_2^2\end{aligned}$$

2. find the Fourier transform  $\tilde{u}_0(\xi)$  of  $u_0$

$$\begin{aligned}u_0(x) &= e^{-3ix_2}x_0^{-1}\sin(x_0)e^{2.5ix_1}e^{-x_2^2}, \\ \tilde{u}_0(\xi) &= \pi^{3/2}\mathbf{1}_{[-(2\pi)^{-1}, (2\pi)^{-1}]}(\xi_0)\delta_0(\xi_1 - 2.5(2\pi)^{-1})e^{-\pi^2(\xi_2 + 3(2\pi)^{-1})^2}\end{aligned}$$

3. find the set  $\mathcal{F}$  of frequency  $\xi$  for which  $\tilde{u}_0(\xi) \neq 0$

$$\mathcal{F} = [-(2\pi)^{-1}, (2\pi)^{-1}] \times \{2.5(2\pi)^{-1}\} \times (-\infty, +\infty)$$

4. minimize  $f(\xi)$  on  $\mathcal{F}$   
 $\min_{\mathcal{F}}(f(\xi)) = -22.6$
5. output (0,0) if this minimum is infinite, (1,0) is finite and negative, (1,1) if finite and positive. (optionally) output  $\mathcal{F}$   
 Out = (1,0) : there exists a solution  $u$  ; it does not vanish at  $t \rightarrow +\infty$

### A.3 EXAMPLES OF INPUTS AND OUTPUTS

#### A.3.1 LOCAL STABILITY

| System                                                                                                                                                                                                                                                                                                                             | Speed of convergence<br>at $x_e = [0.01]$ |
|------------------------------------------------------------------------------------------------------------------------------------------------------------------------------------------------------------------------------------------------------------------------------------------------------------------------------------|-------------------------------------------|
| $\begin{cases} \frac{d}{dt}x_0 = -\frac{x_1}{\text{atan}(8x_0x_2)} + \frac{0.01}{\text{atan}(0.0008)} \\ \frac{d}{dt}x_1 = -\cos(9x_0) + \cos(0.09) \\ \frac{d}{dt}x_2 = x_0 - \sqrt{x_1 + x_2} - 0.01 + 0.1\sqrt{2} \end{cases}$                                                                                                  | -1250                                     |
| $\begin{cases} \frac{d}{dt}x_0 = -\frac{2x_2}{x_0 - 2x_2(x_1 - 5)} + 0.182 \\ \frac{d}{dt}x_1 = (x_1 + (x_2 - e^{x_1})(\tan(x_0) + 3))(\log(3) + i\pi) + 3.0\log(3) + 3.0i\pi \\ \frac{d}{dt}x_2 = \text{asin}\left(x_0 \log\left(-\frac{4}{x_1}\right)\right) - \text{asin}(0.06 + 0.01i\pi) \end{cases}$                         | -0.445                                    |
| $\begin{cases} \frac{d}{dt}x_0 = e^{x_1 + e^{-\sin(x_0 - e^2)}} - 1.01e^{-\sin(0.01 - e^2)} \\ \frac{d}{dt}x_1 = 0.06 - 6x_1 \\ \frac{d}{dt}x_2 = -201 + \frac{x_0 + 2}{x_0^2 x_2} \end{cases}$                                                                                                                                    | 6.0 (locally stable)                      |
| $\begin{cases} \frac{d}{dt}x_0 = x_2 e^{-x_1} \sin(x_1) - 9.9 \cdot 10^{-5} \\ \frac{d}{dt}x_1 = 7.75 \cdot 10^{-4} - \frac{e^{x_2} \text{atan}(\text{atan}(x_1))}{4e^{x_2} + 9} \\ \frac{d}{dt}x_2 = (x_1 - \text{asin}(9))e^{-\frac{x_0}{\log(3) + i\pi}} - (0.01 - \text{asin}(9))e^{-\frac{0.01}{\log(3) + i\pi}} \end{cases}$ | -0.0384                                   |
| $\begin{cases} \frac{d}{dt}x_0 = -\frac{x_0(7 - \sqrt[4]{7}\sqrt{i})}{9} - x_1 + 0.0178 - 0.00111\sqrt[4]{7}\sqrt{i} \\ \frac{d}{dt}x_1 = -0.000379 + e^{-\frac{63}{\cos((x_2 - 9)\text{atan}(x_1)) + 7}} \\ \frac{d}{dt}x_2 = -x_0 - x_1 + \text{asin}\left(\cos(x_0) + \frac{x_2}{x_0}\right) - 1.55 + 1.32i \end{cases}$        | $3.52 \cdot 10^{-11}$ (locally stable)    |

## A.3.2 CONTROLLABILITY: AUTONOMOUS SYSTEMS

| Autonomous system                                                                                                                                                                                                                                                                                                                     | Dimension of uncontrollable space at $x_e = [0.5]$ , $u_e = [0.5]$ |
|---------------------------------------------------------------------------------------------------------------------------------------------------------------------------------------------------------------------------------------------------------------------------------------------------------------------------------------|--------------------------------------------------------------------|
| $\begin{cases} \frac{dx_0}{dt} = -\operatorname{asin}\left(\frac{x_1}{9} - \frac{4 \tan(\cos(10))}{9}\right) \\ \quad - \operatorname{asin}\left(\frac{4 \tan(\cos(10))}{9} - 0.0556\right) \\ \frac{dx_1}{dt} = u - x_2 + \log\left(10 + \frac{\tan(x_1)}{u+x_0}\right) - 2.36 \\ \frac{dx_2}{dt} = 2x_1 + x_2 - 1.5 \end{cases}$    | 0 (controllable)                                                   |
| $\begin{cases} \frac{dx_0}{dt} = u - \operatorname{asin}(x_0) - 0.5 + \frac{\pi}{6} \\ \frac{dx_1}{dt} = x_0 - x_1 + 2x_2 + \operatorname{atan}(x_0) - 1.46 \\ \frac{dx_2}{dt} = \frac{5x_2}{\cos(x_2)} - 2.85 \end{cases}$                                                                                                           | 1                                                                  |
| $\begin{cases} \frac{dx_0}{dt} = 6u + 6x_0 - \frac{6x_1}{x_0} \\ \frac{dx_1}{dt} = 0.75 + x_1^2 - \cos(u - x_2) \\ \frac{dx_2}{dt} = -x_0^2 + x_0 + \log(e^{x_2}) - 0.75 \end{cases}$                                                                                                                                                 | 2                                                                  |
| $\begin{cases} \frac{dx_0}{dt} = +x_0 \left( \cos\left(\frac{u}{x_0+2x_2}\right) + \frac{\operatorname{asin}(u)}{x_1} \right) \\ \quad - 0.5 \cos\left(\frac{1}{3}\right) - \frac{\pi}{6} \\ \frac{dx_1}{dt} = \frac{\pi x_1}{4(x_2+4)} - \frac{\pi}{36} \\ \frac{dx_2}{dt} = 2.5 - 108e^{0.5} - 12x_0x_2 + x_1 + 108e^u \end{cases}$ | 0 (controllable)                                                   |
| $\begin{cases} \frac{dx_0}{dt} = -10 \sin\left(\frac{3x_0}{\log(8)} - 22\right) - 6.54 \\ \frac{dx_1}{dt} = \sin\left(9 + \frac{-x_1-4}{8x_2}\right) - 1 \\ \frac{dx_2}{dt} = 4 \tan\left(\frac{4x_0}{u}\right) - 4 \tan(4) \end{cases}$                                                                                              | 1                                                                  |

## A.3.3 CONTROLLABILITY: NON-AUTONOMOUS SYSTEMS

| Non-autonomous system                                                                                                                                                                                                                                                                                     | Local controllability<br>at $x_e = [0.5]$ , $u_e = [0.5]$ |
|-----------------------------------------------------------------------------------------------------------------------------------------------------------------------------------------------------------------------------------------------------------------------------------------------------------|-----------------------------------------------------------|
| $\begin{cases} \frac{dx_0}{dt} = (x_2 - 0.5) e^{-\sin(8)} \\ \frac{dx_1}{dt} = e^{t+0.5} - e^{t+x_1} + \frac{-x_1+e^{\frac{x_0}{u}}}{x_2} + 1 - 2e \\ \frac{dx_2}{dt} = t(x_2 - 0.5) \left( \sin(6) + \sqrt{\tan(8)} \right) \end{cases}$                                                                 | False                                                     |
| $\begin{cases} \frac{dx_0}{dt} = \frac{\operatorname{atan}(\sqrt{x_2})}{x_0-1} - 2 \operatorname{atan}\left(\frac{\sqrt{2}}{2}\right) \\ \frac{dx_1}{dt} = -\frac{u}{-\sqrt{x_0 x_1}+3} + x_2 + \log(x_0) \\ \quad + \log(2) - 0.5 + (1/(6 - \sqrt{2})) \\ \frac{dx_2}{dt} = -70t(x_0 - 0.5) \end{cases}$ | False                                                     |
| $\begin{cases} \frac{dx_0}{dt} = \frac{x_0+7}{\sin(x_0 e^u)+3} \\ \frac{dx_1}{dt} = -\frac{9x_2 e^{-\sin(\sqrt{\log(x_1)})}}{x_0} \\ \frac{dx_2}{dt} = t + \sin(tx_2 + 4) \end{cases}$                                                                                                                    | False                                                     |
| $\begin{cases} \frac{dx_0}{dt} = 0.5 - x_2 + \tan(x_0) - \tan(0.5) \\ \frac{dx_1}{dt} = \frac{t}{x_1(t+\cos(x_1(t+u)))} - \frac{t}{0.5(t+\cos(0.5t+0.25))} \\ \frac{dx_2}{dt} = 2.75 - x_0(u+4) - x_0 \end{cases}$                                                                                        | True                                                      |
| $\begin{cases} \frac{dx_0}{dt} = u(u - x_0 - \tan(8)) + 0.5(\tan(8)) \\ \frac{dx_1}{dt} = -\frac{6t(-2+\frac{\pi}{2})}{x_0 x_1} - 12t(4 - \pi) \\ \frac{dx_2}{dt} = -7(u - 0.5) - 7 \tan(\log(x_2)) \\ \quad + 7 \tan(\log(0.5)) \end{cases}$                                                             | True                                                      |

## A.3.4 STABILITY OF PARTIAL DIFFERENTIAL EQUATIONS USING FOURIER TRANSFORM

| PDE $\partial_t u + D_x u = 0$ and initial condition                                                                                                                                                                                                                                                                                      | Existence of a solution,<br>$u \rightarrow 0$ at $t \rightarrow +\infty$ |
|-------------------------------------------------------------------------------------------------------------------------------------------------------------------------------------------------------------------------------------------------------------------------------------------------------------------------------------------|--------------------------------------------------------------------------|
| $\begin{cases} D_x = 2\partial_{x_0} (2\partial_{x_0}^4 \partial_{x_2}^4 + 3\partial_{x_1}^3 + 3\partial_{x_1}^2) \\ u_0 = \delta_0(-18x_0)\delta_0(-62x_2)e^{89ix_0-8649x_1^2+89ix_1-59ix_2} \end{cases}$                                                                                                                                | False , False                                                            |
| $\begin{cases} D_x = -4\partial_{x_0}^4 - 5\partial_{x_0}^3 - 6\partial_{x_0}^2 \partial_{x_1}^2 \partial_{x_2}^2 + 3\partial_{x_0}^2 \partial_{x_1} - 4\partial_{x_1}^6 \\ u_0 = (162x_0 x_2)^{-1} (e^{i(-25x_0+96x_2)} \sin(54x_0) \sin(3x_2)) \end{cases}$                                                                             | True , False                                                             |
| $\begin{cases} D_x = \partial_{x_1} (4\partial_{x_0}^5 \partial_{x_1} + 4\partial_{x_0}^2 - 9\partial_{x_0} \partial_{x_2}^6 \\ \quad + 2\partial_{x_1}^3 \partial_{x_2}^5 - 4\partial_{x_1}^3 \partial_{x_2}^4 - 2\partial_{x_2}^2) \\ u_0 = (33x_0)^{-1} (e^{86ix_0-56ix_1-16x_2^2+87ix_2} \sin(33x_0)) \end{cases}$                    | True , False                                                             |
| $\begin{cases} D_x = -6\partial_{x_0}^7 \partial_{x_2}^2 + \partial_{x_0}^5 \partial_{x_2}^6 - 9\partial_{x_0}^4 \partial_{x_1}^2 - 9\partial_{x_0}^4 \partial_{x_2}^4 \\ \quad + 7\partial_{x_0}^2 \partial_{x_2}^6 + 4\partial_{x_0}^2 \partial_{x_2}^5 - 6\partial_{x_1}^6 \\ u_0 = \delta_0(88x_1)e^{-2x_0(2312x_0+15i)} \end{cases}$ | True , True                                                              |

## B MATHEMATICAL DEFINITIONS

### B.1 NOTIONS OF STABILITY

Let us consider a system

$$\frac{dx(t)}{dt} = f(x(t)). \quad (7)$$

$x_e$  is an attractor, if there exists  $\rho > 0$  such that

$$|x(0) - x_e| < \rho \implies \lim_{t \rightarrow +\infty} x(t) = x_e. \quad (8)$$

But, counter intuitive as it may seem, this is not enough for asymptotic stability to take place.

**Definition B.1.** We say that  $x_e$  is a locally (asymptotically) stable equilibrium if the two following conditions are satisfied:

(i)  $x_e$  is a stable point, i.e. for every  $\varepsilon > 0$ , there exists  $\eta > 0$  such that

$$|x(0) - x_e| < \eta \implies |x(t) - x_e| < \varepsilon, \forall t \geq 0. \quad (9)$$

(ii)  $x_e$  is an attractor, i.e. there exists  $\rho > 0$  such that

$$|x(0) - x_e| < \rho \implies \lim_{t \rightarrow +\infty} x(t) = x_e. \quad (10)$$

In fact, the SMT of Subsection 3.1 deals with an even stronger notion of stability, namely the exponential stability defined as follows:

**Definition B.2.** We say that  $x_e$  is an exponentially stable equilibrium if  $x_e$  is locally stable equilibrium and, in addition, there exist  $\rho > 0$ ,  $\lambda > 0$ , and  $M > 0$  such that

$$|x(0) - x_e| < \rho \implies |x(t)| \leq M e^{-\lambda t} |x(0)|.$$

In this definition,  $\lambda$  is called the exponential convergence rate, which is the quantity predicted in our first task. Of course, if  $x_e$  is locally exponentially stable it is in addition locally asymptotically stable.

### B.2 CONTROLLABILITY

We give here a proper mathematical definition of controllability. Let us consider a non-autonomous system

$$\frac{dx(t)}{dt} = f(x(t), u(t), t), \quad (11)$$

such that  $f(x_e, u_e) = 0$ .

**Definition B.3.** Let  $\tau > 0$ , we say that the nonlinear system (11) is locally controllable at the equilibrium  $x_e$  in time  $\tau$  with asymptotic control  $u_e$  if, for every  $\varepsilon > 0$ , there exists  $\eta > 0$  such that, for every  $(x_0, x_1) \in \mathbb{R}^n \times \mathbb{R}^n$  with  $|x_0 - x_e| \leq \eta$  and  $|x_1 - x_e| \leq \eta$  there exists a trajectory  $(x, u)$  such that

$$\begin{aligned} x(0) &= x_0, & x(\tau) &= x_1 \\ |u(t) - u_e| &\leq \varepsilon, & \forall t &\in [0, \tau]. \end{aligned} \quad (12)$$

An interesting remark is that if the system is autonomous, the local controllability does not depend on the time  $\tau$  considered, which explains that it is not precised in Theorem 3.2

### B.3 TEMPERED DISTRIBUTION

We start by recalling the multi-index notation: let  $\alpha = (\alpha_1, \dots, \alpha_n) \in \mathbb{N}^n$ ,  $x \in \mathbb{R}^n$ , and  $f \in C^\infty(\mathbb{R}^n)$ , we denote

$$\begin{aligned} x^\alpha &= x_1^{\alpha_1} \times \dots \times x_n^{\alpha_n} \\ \partial_x^\alpha f &= \partial_{x_1}^{\alpha_1} \dots \partial_{x_n}^{\alpha_n} f. \end{aligned} \quad (13)$$

$\alpha$  is said to be a multi-index and  $|\alpha| = \sum_{i=1}^n |\alpha_i|$ . Then we give the definition of the Schwartz functions:

**Definition B.4.** A function  $\phi \in C^\infty$  belongs to the Schwartz space  $\mathcal{S}(\mathbb{R}^n)$  if, for any multi-index  $\alpha$  and  $\beta$ ,

$$\sup_{x \in \mathbb{R}^n} |x^\alpha \partial_x^\beta \phi| < +\infty. \quad (14)$$

Finally, we define the space of tempered distributions:

**Definition B.5.** A tempered distribution  $\phi \in \mathcal{S}'(\mathbb{R}^n)$  is a linear form  $u$  on  $\mathcal{S}(\mathbb{R}^n)$  such that there exists  $p > 0$  and  $C > 0$  such that

$$|\langle u, \phi \rangle| \leq C \sum_{|\alpha|, |\beta| < p} \sup_{x \in \mathbb{R}^n} |x^\alpha \partial_x^\beta \phi|, \quad \forall \phi \in \mathcal{S}(\mathbb{R}^n). \quad (15)$$

## C ADDITIONAL EXPERIMENTS

### C.1 PREDICTION OF SPEED OF CONVERGENCE WITH HIGHER PRECISION

In Section 5.1,  $\lambda$  is predicted with a 10% margin error. Prediction of  $\lambda$  to better accuracy can be achieved by training models on data rounded to 2, 3 or 4 significant digits, and measuring the number of exact predictions on the test sample. Overall, we predict  $\lambda$  with two significant digits in 59.2% of test cases. Table 7 summarizes the results for different precisions (for transformers with 6 layers and a dimensionality of 512).

Table 7: Exact prediction of local convergence speed to given precision.

|          | Degree 2 | Degree 3 | Degree 4 | Degree 5 | Degree 6 | Overall |
|----------|----------|----------|----------|----------|----------|---------|
| 2 digits | 83.5     | 68.6     | 55.6     | 48.3     | 40.0     | 59.2    |
| 3 digits | 75.3     | 53.2     | 39.4     | 33.4     | 26.8     | 45.7    |
| 4 digits | 62.0     | 35.9     | 25.0     | 19.0     | 14.0     | 31.3    |

## D PROOFS OF THEOREMS

### D.1 ANALYSIS OF PROBLEM 2

The proofs of Theorem 3.2 of validity of the feedback matrix given by the expression (3), and of the extension of Theorem 3.2 to the non-autonomous system given by condition (4) can be found in Coron (2007). We give here the key steps of the proof for showing that the matrix  $K$  given by (3) is a valid feedback matrix to illustrate the underlying mechanisms:

- Setting  $V(x(t)) = x(t)^{tr} C_T^{-1} x(t)$ , where  $x$  is solution to  $x'(t) = f(x, u_e + K \cdot (x - x_e))$ , and

$$C_T = \left( e^{-AT} \left[ \int_0^T e^{-At} B B^{tr} e^{-A^{tr} t} dt \right] e^{-A^{tr} T} \right). \quad (16)$$

- Showing, using the form of  $C_T$ , that

$$\frac{d}{dt}(V(x(t))) = -|B^{tr} C_T^{-1} x(t)|^2 - |B^{tr} e^{-TA^{tr}} C_T^{-1} x(t)|^2$$

- Showing that, if for any  $t \in [0, T]$ ,  $|B^{tr} C_T^{-1} x(t)|^2 = 0$ , then for any  $i \in \{0, \dots, n-1\}$ ,

$$x^{tr} C_T^{-1} A^i B = 0, \quad \forall t \in [0, T].$$

- Deducing from the controllability condition (2), that

$$x(t)^{tr} C_T^{-1} = 0, \quad \forall t \in [0, T].$$

and therefore from the invertibility of  $C_T^{-1}$ ,

$$x(t) = 0, \quad \forall t \in [0, T].$$

- Concluding from the previous and LaSalle invariance principle that the system is locally exponentially stable.

## D.2 ANALYSIS OF PROBLEM 3

In this section we prove Proposition 3.1. We study the problem

$$\partial_t u + \sum_{|\alpha| \leq k} a_\alpha \partial_x^\alpha u = 0 \text{ on } \mathbb{R}_+ \times \mathbb{R}^n, \quad (17)$$

with initial condition

$$u(0, \cdot) = u_0 \in \mathcal{S}'(\mathbb{R}^n), \quad (18)$$

and we want to find a solution  $u \in C^0([0, T], \mathcal{S}'(\mathbb{R}^n))$ .

Denoting  $\tilde{u}$  the Fourier transform of  $u$  with respect to  $x$ , the problem is equivalent to

$$\partial_t \tilde{u}(t, \xi) + \sum_{|\alpha| \leq k} a_\alpha (i\xi)^\alpha \tilde{u}(t, \xi) = 0, \quad (19)$$

with initial condition  $\tilde{u}_0 \in \mathcal{S}(\mathbb{R}^n)$ . As the only derivative now is with respect to time, we can check that

$$\tilde{u}(t, \xi) = \tilde{u}_0(\xi) e^{-f(\xi)t}, \quad (20)$$

where  $f(\xi) = \sum_{|\alpha| \leq k} a_\alpha (i\xi)^\alpha$ , is a weak solution to (19) belonging to the space  $C^0([0, +\infty), \mathcal{D}'(\mathbb{R}^n))$ . Indeed, first of all we can check that for any  $t \in [0, +\infty)$ ,  $\xi \rightarrow \exp(-f(\xi)t)$  is a continuous function and  $\tilde{u}_0$  belongs to  $\mathcal{S}'(\mathbb{R}^n) \subset \mathcal{D}'(\mathbb{R}^n)$ , thus  $\tilde{u}(t, \cdot)$  belongs to  $\mathcal{D}'(\mathbb{R}^n)$ . Besides,  $t \rightarrow e^{-f(\xi)t}$  is a  $C^\infty$  function whose derivative in time are of the form  $P(\xi)e^{-f(\xi)t}$  where  $P(\xi)$  is a polynomial function.  $\tilde{u}$  is continuous in time and  $\tilde{u} \in C^0([0, +\infty), \mathcal{D}'(\mathbb{R}^n))$ . Now we check that it is a weak solution to (19) with initial condition  $\tilde{u}_0$ . Let  $\phi \in C_c^\infty([0, +\infty) \times \mathbb{R}^n)$  the space of smooth functions with compact support, we have

$$\begin{aligned} & -\langle \tilde{u}, \partial_t \phi \rangle + \sum_{|\alpha| \leq k} a_\alpha (i\xi)^\alpha \langle \tilde{u}, \phi \rangle + \langle \tilde{u}_0, \phi \rangle \\ &= -\langle \tilde{u}_0, \partial_t (e^{-\overline{f(\xi)}t} \phi) \rangle - \langle \tilde{u}_0, \overline{f(\xi)} e^{-\overline{f(\xi)}t} \phi \rangle + \langle \tilde{u}_0, e^{-\overline{f(\xi)}t} \overline{f(\xi)} \phi \rangle + \langle \tilde{u}_0, \phi \rangle \\ &= 0. \end{aligned} \quad (21)$$

Hence,  $u$  defined by (20) is indeed a weak solution of (19) in  $C^0([0, +\infty), \mathcal{D}'(\mathbb{R}^n))$ . Now, this does not answer our question as this only tells us that at time  $t > 0$ ,  $u(t, \cdot) \in \mathcal{D}'(\mathbb{R}^n)$  which is a less regular space than the space of tempered distribution  $\mathcal{S}'(\mathbb{R}^n)$ . In other words, at  $t = 0$ ,  $\tilde{u} = \tilde{u}_0$  has a higher regularity by being in  $\mathcal{S}'(\mathbb{R}^n)$  and we would like to know if equation (19) preserves this regularity. This is more than a regularity issue as, if not, one cannot define a solution  $u$  as the inverse Fourier Transform of  $\tilde{u}$  because such function might not exist. Assume now that there exists a constant  $C$  such that

$$\forall \xi \in \mathbb{R}^n, \quad \tilde{u}_0(\xi) = 0 \text{ or } \operatorname{Re}(f(\xi)) > C. \quad (22)$$

$$\forall \xi \in \mathbb{R}^n, \quad \mathbf{1}_{\operatorname{supp}(\tilde{u}_0)} e^{-f(\xi)t} \leq e^{-Ct}. \quad (23)$$

This implies that, for any  $t > 0$ ,  $\tilde{u} \in \mathcal{S}'(\mathbb{R}^n)$ . Besides, defining for any  $p \in \mathbb{N}$ ,

$$\mathcal{N}_p(\phi) = \sum_{|\alpha|, |\beta| < p} \sup_{\xi \in \mathbb{R}^n} |\xi^\alpha \partial_\xi^\beta \phi(\xi)|, \quad (24)$$

then for  $t_1, t_2 \in [0, T]$ ,

$$\mathcal{N}_p((e^{-f(\xi)t_1} - e^{-f(\xi)t_2})\phi) = \sum_{|\alpha|, |\beta| < p} \sup_{\xi \in \mathbb{R}^n} |\xi^\alpha P_\beta(\xi, \phi)|, \quad (25)$$

where  $P_\beta(\xi, \phi)$  is polynomial with  $f(\xi)$ ,  $\phi(\xi)$ , and their derivatives of order strictly smaller than  $p$ . Besides, each term of this polynomial tend to 0 when  $t_1$  tends to  $t_2$  on  $\text{supp}(\tilde{u}_0)$ , the set of frequency of  $u_0$ . Indeed, let  $\beta_1$  be a multi-index,  $k \in \mathbb{N}$ , and  $Q_i(\xi)$  be polynomials in  $\xi$ , where  $i \in \{0, \dots, k\}$ .

$$\begin{aligned} & \left| \mathbf{1}_{\text{supp}(u_0)} \partial_\xi^{\beta_1} \phi(\xi) \left( \sum_{i=0}^k Q_i(\xi) t_1^i e^{-f(\xi)t_1} - Q_i(\xi) t_2^i e^{-f(\xi)t_2} \right) \right| \\ & \leq \sum_{i=0}^k \max_{\text{supp}(\tilde{u}_0)} \left| t_1^i e^{-f(\xi)t_1} - t_2^i e^{-f(\xi)t_2} \right| \max_{\xi \in \mathbb{R}^n} \left| \partial_\xi^{\beta_1} \phi(\xi) Q_i(\xi, t) \right|. \end{aligned} \quad (26)$$

From (22), the time-dependant terms in the right-hand sides converge to 0 when  $t_1$  tends to  $t_2$ . This implies that  $u \in C^0([0, T], \mathcal{S}'(\mathbb{R}^n))$ . Finally let us show the property of the behavior at infinity. Assume that  $C > 0$ , one has, for any  $\phi \in \mathcal{S}'(\mathbb{R}^n)$

$$\langle \tilde{u}(t, \cdot), \phi \rangle = \langle \tilde{u}_0, \mathbf{1}_{\text{supp}(\tilde{u}_0)} e^{-\overline{f(\xi)}t} \phi \rangle. \quad (27)$$

Let us set  $g(\xi) = e^{-\overline{f(\xi)}t} \phi(\xi)$ , one has for two multi-index  $\alpha$  and  $\beta$

$$|\xi^\alpha \partial_\xi^\beta g(\xi)| \leq |\xi^\alpha Q(\xi) e^{-f(\xi)t}|, \quad (28)$$

where  $Q$  is a sum of polynomials, each multiplied by  $\phi(\xi)$  or one of its derivatives. Thus  $\xi^\alpha Q(\xi)$  belongs to  $\mathcal{S}(\mathbb{R}^n)$  and therefore, from assumption (22),

$$|\xi^\alpha \partial_\xi^\beta g(\xi)| \mathbf{1}_{\text{supp}(u_0)} \leq \max_{\xi \in \mathbb{R}^n} |\xi^\alpha Q(\xi)| e^{-Ct}, \quad (29)$$

which goes to 0 when  $t \rightarrow +\infty$ . This imply that  $\tilde{u}(t, \cdot) \rightarrow 0$  in  $\mathcal{S}'(\mathbb{R}^n)$  when  $t \rightarrow +\infty$ , and hence  $u(t, \cdot) \rightarrow 0$ . This ends the proof of Proposition 3.1

Let us note that one could try to find solutions with lower regularity, where  $u$  is a distribution of  $\mathcal{D}'(\mathbb{R}_+ \times \mathbb{R}^n)$ , and satisfies the equation

$$\partial_t u + \sum_{|\alpha| \leq k} a_\alpha \partial_x^\alpha u = \delta_{t=0} u_0 \text{ on } \mathbb{R}_+ \times \mathbb{R}^n. \quad (30)$$

This could be done using for instance Malgrange-Ehrenpreis theorem, however, studying the behavior at  $t \rightarrow +\infty$  may be harder mathematically, hence this approach was not considered in this paper.

## E SIZE OF THE PROBLEM SPACE

Lample and Charton (2020) provide the following formula to calculate the number of functions with  $m$  operators:

$$\begin{aligned} E_0 &= L \\ E_1 &= (q_1 + q_2 L)L \\ (m+1)E_m &= (q_1 + 2q_2 L)(2m-1)E_{m-1} - q_1(m-2)E_{m-2} \end{aligned}$$

Where  $L$  is the number of possible leaves (integers or variables), and  $q_1$  and  $q_2$  the number of unary and binary operators. In the stability and controllability problems, we have  $q_1 = 9$ ,  $q_2 = 4$  and  $L = 20 + q$ , with  $q$  the number of variables.

Replacing, we have, for a function with  $q$  variables and  $m$  operators

$$\begin{aligned} E_0(q) &= 20 + q \\ E_1(q) &= (89 + 4q)(20 + q) \\ (m + 1)E_m(q) &= (169 + 8q)(2m - 1)E_{m-1} - 4(m - 2)E_{m-2} \end{aligned}$$

In the stability problem, we sampled systems of  $n$  functions, with  $n$  variables,  $n$  from 2 to 6. Functions have between 3 and  $2n + 2$  operators. The number of possible systems is

$$PS_{st} = \sum_{n=2}^6 \left( \sum_{m=3}^{2n+2} E_m(n) \right)^n > E_{14}(6)^6 \approx 3.10^{212}$$

(since  $E_m(n)$  increases exponentially with  $m$  and  $n$ , the dominant factor in the sum is the term with largest  $m$  and  $n$ )

In the autonomous controllability problem, we generated systems with  $n$  functions ( $n$  between 3 and 6), and  $n + p$  variables ( $p$  between 1 and  $n/2$ ). Functions had between  $n + p$  and  $2n + 2p + 2$  operators. The number of systems is

$$PS_{aut} = \sum_{n=3}^6 \left( \sum_{p=1}^{n/2} \sum_{m=n+p}^{2(n+p+1)} E_m(n+p) \right)^n > E_{20}(9)^6 \approx 4.10^{310}$$

For the non-autonomous case, the number of variables in  $n + p + 1$ ,  $n$  is between 2 and 3 and  $p = 1$ , therefore

$$PS_{naut} = \sum_{n=2}^3 \left( \sum_{m=n+1}^{2(n+2)} E_m(n+2) \right)^n > E_{10}(5)^3 \approx 5.10^{74}$$

Because expressions with indefinite or degenerate jacobians are skipped, the actual problem space size will be smaller by several orders of magnitude. Yet, problem space remains large enough for overfitting by memorizing problems and solutions to be impossible.
